# Supplementary material for: Bortezomib Induces Anti–Multiple Myeloma Immune Response Mediated by cGAS/STING Pathway Activation
Source: Oxford University Press journal article supplement (doi:10.1158/2643-3230.bcd-21-0047), 2021-04-23
Supplement: 26433230bcd210047-sup-262267_2_supp_7047352_qrg9rs.docx [file 26433230bcd210047-sup-262267_2_supp_7047352_qrg9rs.docx]

**Supplementary Table S1**

**Immune genes regulated after treatment with BTZ *in vivo*.** List of 90 immune-related genes differentially expressed in 5TGM1WT and *Calr*KO tumors as depicted in Fig. 4a.

| **Gene list** | **Gene ID** | **Description** |
| --- | --- | --- |
| TNFRSF9 | ENSG00000049249.8 | TNF Receptor Superfamily Member 9 |
| TNFRSF1B | ENSG00000028137.16 | TNF Receptor Superfamily Member 1B |
| DHRS3 | ENSG00000162496.8 | Dehydrogenase/Reductase 3 |
| FGR | ENSG00000000938.12 | FGR Proto-Oncogene, Src Family Tyrosine Kinase |
| PTAFR | ENSG00000169403.11 | Platelet Activating Factor Receptor |
| CSF3R | ENSG00000119535.17 | Colony Stimulating Factor 3 Receptor |
| CSF1 | ENSG00000184371.13 | Colony Stimulating Factor 1 |
| CD2 | ENSG00000116824.4 | CD2 |
| SHE | ENSG00000169291.9 | Src Homology 2 Domain Containing E |
| SYT11 | ENSG00000132718.8 | Synaptotagmin 11 |
| CD247 | ENSG00000198821.10 | CD247 |
| SELP | ENSG00000174175.16 | Selectin P |
| SELL | ENSG00000188404.8 | Selectin L |
| IL10 | ENSG00000136634.5 | Interleukin 10 |
| NLRP3 | ENSG00000162711.16 | NLR Family Pyrin Domain Containing 3 |
| CD8A | ENSG00000153563.15 | CD8A |
| ZAP70 | ENSG00000115085.13 | Zeta Chain Of T Cell Receptor Associated Protein Kinase 70 |
| IL1R1 | ENSG00000115594.11 | Interleukin 1 Receptor Type 1 |
| MARCO | ENSG00000019169.10 | Macrophage Receptor With Collagenous Structure |
| INHBB | ENSG00000163083.5 | Inhibin Subunit Beta B |
| ICOS | ENSG00000163600.12 | Inducible T Cell Costimulator |
| EOMES | ENSG00000163508.12 | Eomesodermin |
| CCRL2 | ENSG00000121797.9 | C-C Motif Chemokine Receptor Like 2 |
| STAB1 | ENSG00000010327.10 | Stabilin 1 |
| PROK2 | ENSG00000163421.8 | Prokineticin 2 |
| EREG | ENSG00000124882.3 | Epiregulin |
| CXCL9 | ENSG00000138755.5 | C-X-C Motif Chemokine Ligand 9 |
| SPP1 | ENSG00000118785.13 | Secreted Phosphoprotein 1 |
| TLR2 | ENSG00000137462.6 | Toll Like Receptor 2 |
| IL7R | ENSG00000168685.14 | Interleukin 7 Receptor |
| OSMR | ENSG00000145623.12 | Oncostatin M Receptor |
| FYB | ENSG00000082074.15 | FYN Binding Protein 1 |
| HBEGF | ENSG00000113070.7 | Heparin Binding EGF Like Growth Factor |
| LCP2 | ENSG00000043462.11 | Lymphocyte Cytosolic Protein 2 |
| RNF144B | ENSG00000137393.9 | Ring Finger Protein 144B |
| TNFRSF21 | ENSG00000146072.6 | TNF Receptor Superfamily Member 21 |
| INHBA | ENSG00000122641.9 | Inhibin Subunit Beta A |
| EGFR | ENSG00000146648.15 | Epidermal Growth Factor Receptor |
| FGL2 | ENSG00000127951.5 | Fibrinogen Like 2 |
| SERPINE1 | ENSG00000106366.8 | Serpin Family E Member 1 |
| CLEC5A | ENSG00000258227.6 | C-Type Lectin Domain Containing 5A |
| SLC7A2 | ENSG00000003989.16 | Solute Carrier Family 7 Member 2 |
| GCNT1 | ENSG00000187210.12 | Glucosaminyl (N-Acetyl) Transferase 1 |
| ABCA1 | ENSG00000165029.15 | ATP Binding Cassette Subfamily A Member 1 |
| NCS1 | ENSG00000107130.9 | NCS1 |
| IL2RA | ENSG00000134460.15 | Interleukin 2 Receptor Subunit Alpha |
| NRP1 | ENSG00000099250.17 | Neuropilin 1 |
| PRF1 | ENSG00000180644.6 | Perforin 1 |
| IFIT2 | ENSG00000119922.8 | Interferon Induced Protein With Tetratricopeptide Repeats 2 |
| IFITM3 | ENSG00000142089.15 | Interferon Induced Transmembrane Protein 3 |
| SPI1 | ENSG00000066336.11 | Hematopoietic Transcription Factor PU.1 |
| SERPING1 | ENSG00000149131.15 | Serpin Family G Member 1 |
| IL18BP | ENSG00000137496.17 | Interleukin 18 Binding Protein |
| P2RY2 | ENSG00000175591.11 | Purinergic Receptor P2Y2 |
| CD3E | ENSG00000198851.9 | CD3E |
| CD3G | ENSG00000160654.9 | CD3G |
| THY1 | ENSG00000154096.13 | Thy-1 Cell Surface Antigen |
| CD4 | ENSG00000010610.9 | CD4 |
| C3AR1 | ENSG00000171860.4 | Complement C3a Receptor 1 |
| OLR1 | ENSG00000173391.8 | Oxidized Low Density Lipoprotein Receptor 1 |
| IFNG | ENSG00000111537.4 | Interferon Gamma |
| CMKLR1 | ENSG00000174600.13 | Chemerin Chemokine-Like Receptor 1 |
| MMP14 | ENSG00000157227.12 | Matrix Metallopeptidase 14 |
| GZMB | ENSG00000100453.12 | Granzyme B |
| PTGER2 | ENSG00000125384.6 | Prostaglandin E Receptor 2 |
| PRKCH | ENSG00000027075.13 | Protein Kinase C Eta |
| HIF1A | ENSG00000100644.16 | Hypoxia Inducible Factor 1 Subunit Alpha |
| GPR65 | ENSG00000140030.5 | G Protein-Coupled Receptor 65 |
| MEFV | ENSG00000103313.11 | MEFV Innate Immuity Regulator, Pyrin |
| IRF8 | ENSG00000140968.10 | Interferon Regulatory Factor 8 |
| SCARF1 | ENSG00000074660.15 | Scavenger Receptor Class F Member 1 |
| PIK3R5 | ENSG00000141506.13 | Phosphoinositide 3-kinase regulatory subunit 5 |
| CCL2 | ENSG00000108691.9 | C-C Motif Chemokine Ligand 2 |
| ITGB3 | ENSG00000259207.7 | Integrin Subunit Beta 3 |
| IFI30 | ENSG00000216490.3 | lysosomal thiol reductase |
| SCN1B | ENSG00000105711.10 | Sodium Voltage-Gated Channel Beta Subunit 1 |
| AXL | ENSG00000167601.11 | AXL Receptor Tyrosine Kinase |
| PLAUR | ENSG00000011422.11 | Plasminogen Activator, Urokinase Receptor |
| PTGIR | ENSG00000160013.8 | Prostaglandin I2 Receptor |
| C5AR1 | ENSG00000197405.7 | Complement C5a Receptor 1 |
| FPR1 | ENSG00000171051.8 | Formyl Peptide Receptor 1 |
| CST7 | ENSG00000077984.5 | Cystatin F |
| SAMHD1 | ENSG00000101347.8 | SAM And HD Domain Containing Deoxynucleoside Triphosphate Triphosphohydrolase 1 |
| TGM2 | ENSG00000198959.11 | Transglutaminase 2 |
| MMP9 | ENSG00000100985.7 | Matrix Metallopeptidase 9 |
| ITGB2 | ENSG00000160255.16 | Integrin Subunit Beta 2 |
| COL6A1 | ENSG00000142156.14 | Collagen Type VI Alpha 1 Chain |
| OSM | ENSG00000099985.3 | Oncostatin M |
| IL2RB | ENSG00000100385.13 | Interleukin 2 Receptor Subunit Beta |
| CFP | ENSG00000126759.12 | Complement Factor Properdin |
|  |  |  |
